# Supplementary material for: SPANXN2 functions a cell migration inhibitor in testicular germ cell tumor cells
Source: PeerJ journal article supplement (doi:10.7717/peerj.9358), 2020-06-23

TCAM-2                      NCCIT  
NC   SPANXN2    NC   SPANXN2

Vimentin

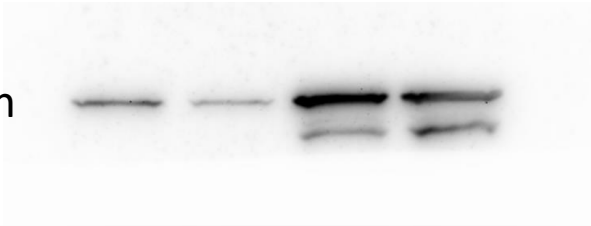

Snail

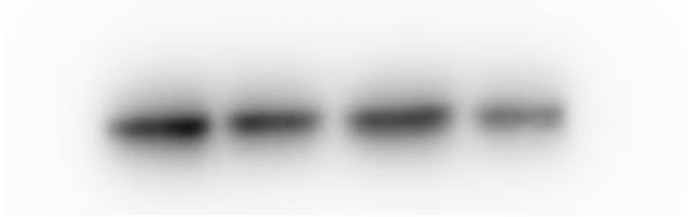

$\alpha$ -Tubulin

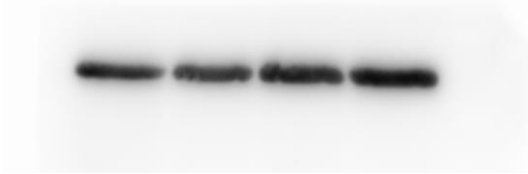

p-AKT

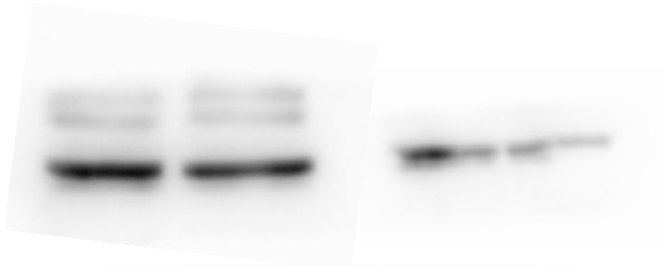

AKT

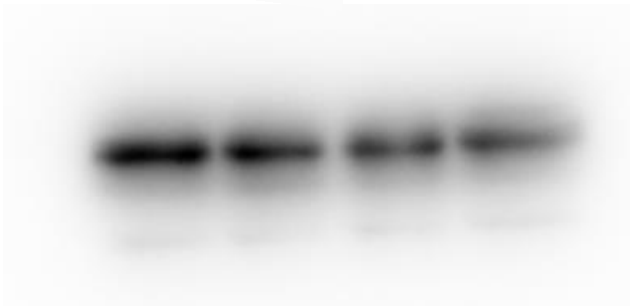

GAPDH

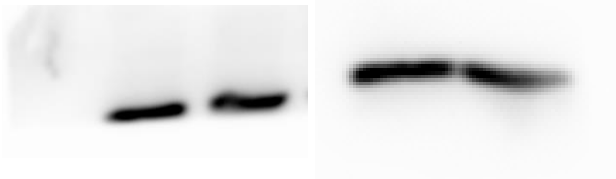

Supplement: Supplemental_File_3.pdf [file Supplemental_File_3.pdf]
